# Supplementary material
Source: ML conference proceedings conference paper supplement (https://openaccess.thecvf.com/content/ICCV2023/html/Ji_Uncertainty-guided_Learning_for_ICCV_2023_paper.html)
Supplement: Supplementary file 1 [file Ji_Uncertainty-guided_Learning_for_ICCV_2023_supplemental.pdf]

# Appendix of Paper: Uncertainty-guided Learning for Improving Image Manipulation Detection

Kaixiang Ji<sup>1</sup> Feng Chen<sup>1</sup> Xin Guo<sup>1</sup> Yadong Xu<sup>2</sup> Jian Wang<sup>1\*</sup> Jingdong Chen<sup>1</sup>  
<sup>1</sup> Ant Group <sup>2</sup> Tsinghua University

{kaixiang.jkx, bangzhu.gx, bobblair.wj, jingdongchen.cjd}@antgroup.com  
 chenfeng1271@gmail.com xuyd17@mails.tsinghua.edu.cn

## 1. Feature Extractor

It is worth noting that our proposed UEN is applicable to other segmentation-based image manipulation detection methods. Without loss of generality, we present a feature extractor with a general design. Specifically, we adopt HRNetV2 [2] as a basic RGB branch backbone network. The main body of HRNetV2 comprises multiple blocks and is shown in Figure 1. We denote  $f_{sr}$  as one block in the  $s$ -th stage and  $r$  is the resolution index. The RGB branch consists of 4 representations:  $\{f_{sr}^{RGB}; s \in \{1, 2, 3, 4\}, r \in \{1, 2, 3, 4\}\}$ . The input resolution is  $\frac{1}{4}$  of the original image resolution because of a preceding stem ahead of  $f_{11}$  which comprises two  $3 \times 3$  convolutions with stride 2. The resolution of index  $r$  is  $\frac{1}{2^{r+1}}$  of the original resolution. SRM [3] and resampling feature [1] have shown incredible performance, so we add an SRM branch and a resampling branch parallelly. For the SRM branch, we first pass the input image through an SRM layer, accompanied by two consecutive  $3 \times 3$  convolution layers with stride 2. Therefore, the SRM branch starts with  $\frac{1}{4}$  resolution. The SRM branch consists of 4 representations:  $\{f_{sr}^{SRM}; s \in \{1, 2, 3, 4\}, r \in \{1, 2, 3, 4\}\}$ . For the resampling branch, following [1], we extract the resampling feature from  $32 \times 32$  non-overlapping patches. Thus, resampling branch starts with  $\frac{1}{32}$  resolution, and consists of 1 representation:  $\{f_{sr}^{Resampling}; s \in \{4\}, r \in \{4\}\}$ . The output embeddings of each branch in the 4-th stage are all concatenated at the corresponding resolution, and the representation head remains consistent with HRNetV2 except for the number of channels.

## References

- [1] Jawadul H. Bappy, Cody Simons, Lakshmanan Nataraj, B. S. Manjunath, and Amit K. Roy-Chowdhury. Hybrid lstm and encoder-decoder architecture for detection of image forgeries. *IEEE TIP*, 28(7):3286–3300, 2019.

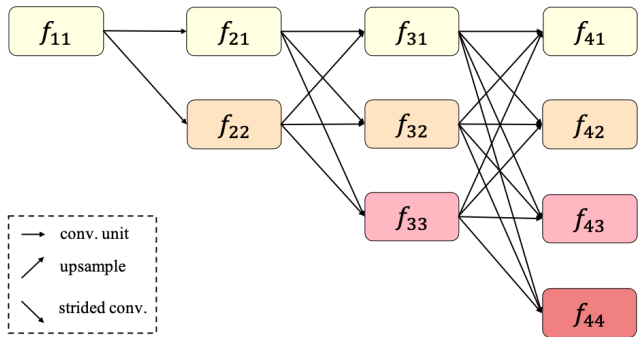

Figure 1: Structure of the RGB stream backbone network.

- [2] Jingdong Wang, Ke Sun, Tianheng Cheng, Borui Jiang, Chaorui Deng, Yang Zhao, Dong Liu, Yadong Mu, Mingkui Tan, Xinggang Wang, Wenyu Liu, and Bin Xiao. Deep high-resolution representation learning for visual recognition. *IEEE TPAMI*, 43(10):3349–3364, 2021.
- [3] Peng Zhou, Xintong Han, Vlad I. Morariu, and Larry S. Davis. Learning rich features for image manipulation detection. In *CVPR*, pages 1053–1061, 2018.

\*Corresponding author: bobblair.wj@antgroup.com
